# Supplementary material
Source: HighWire-hosted journal article supplement (https://cancerimmunolres.aacrjournals.org/content/suppl/2019/07/16/2326-6066.CIR-18-0757)
Supplement: 210851_2_supp_5520366_prhfmv.pdf [file 210851_2_supp_5520366_prhfmv.pdf]

**S. Table 1. Clinicopathological characteristics of patients in each cohort**

| <b>Group</b>        | <b>Cohort 1</b>          | <b>Cohort 2</b>          | <b>Cohort 3</b>   | <b>Cohort 4</b> |
|---------------------|--------------------------|--------------------------|-------------------|-----------------|
| Tumor type          | Hepatocellular Carcinoma | Hepatocellular Carcinoma | Bladder Carcinoma | Skin Melanoma   |
| Number of patients  | 28                       | 442                      | 413               | 479             |
| Sex (male)          | 23(82.1%)                | 255 (57.7%)              | 305 (73.8%)       | 299 (62.4%)     |
| Age (years)         | 54.8 ± 11.3              | 59.5 ± 13.5              | 68.1 ± 10.6       | 58.2 ± 15.7     |
| Height (cm)         | --                       | 185.8 ± 4.5              | 171.5 ± 11.5      | 167.9 ± 9.3     |
| Initial Weight (lb) | --                       | 317.7 ± 288.9            | 79.4 ± 21.5       | 73.3 ± 17.2     |
| Race (white)        | 0 (0%)                   | 187 (42.3%)              | 327 (79.2%)       | 447 (93.3%)     |
| Diameter (cm)       | 7.3 ± 3.5                | --                       | --                | --              |
| Metastasis (+)      | 2 (7.1%)                 | 101 (22.9%)              | 217 (52.5%)       | 61 (12.7%)      |
| Recurrence (+)      | 9 (32.1%)                | 179 (40.5%)              | 260 (63.0%)       | 144 (30.1%)     |
| OS (+)              | 18 (64.3%)               | 245 (55.4%)              | 230 (55.7%)       | 247 (51.6%)     |
| AFP (ng/ml)         | 159.9 ± 339.1            | 4112.9±15731.7           | --                | --              |

Abbreviations: OS, overall survival; DFS, disease-free survival.
